# Supplementary material for: A Place-Based Community Health Worker Program: Feasibility and Early Outcomes, New York City, 2015
Source: Am J Prev Med. Author manuscript; Available in PMC 2017 Oct 25. (PMC5656273; doi:10.1016/j.amepre.2016.08.034)
Supplement: Supplemental file [file NIHMS874748-supplement-Supplemental_file.pdf]

**Appendix Table 1.** Pre-Intervention Rapid Needs Assessment Survey Results from Intervention and Comparison Public Housing Developments and Related Focus Group Findings: December 2014-January 2015, East Harlem, New York City

| Characteristic                           | Intervention developments |       | Comparison developments |       | <i>p</i> -value |
|------------------------------------------|---------------------------|-------|-------------------------|-------|-----------------|
|                                          | Weighted N                | %     | Weighted N              | %     |                 |
| Total                                    | 6,241                     |       | 8,356                   |       |                 |
| <b>I. Demographics</b>                   |                           |       |                         |       |                 |
| Age group                                |                           |       |                         |       | 0.720           |
| 35-49                                    | 1,978                     | 31.7% | 2,649                   | 31.7% |                 |
| 40-64                                    | 2,209                     | 35.4% | 3,117                   | 37.3% |                 |
| 65+                                      | 2,053                     | 32.9% | 2,590                   | 31.0% |                 |
| Gender                                   |                           |       |                         |       | 0.941           |
| Female                                   | 4,550                     | 72.9% | 6,108                   | 73.1% |                 |
| Male                                     | 1,691                     | 27.1% | 2,248                   | 26.9% |                 |
| Race/Ethnicity*                          |                           |       |                         |       | 0.080           |
| Asian                                    | 195                       | 3.2%  | 146                     | 1.8%  |                 |
| Black                                    | 2,609                     | 42.9% | 3,225                   | 38.8% |                 |
| Hispanic                                 | 3,033                     | 49.9% | 4,270                   | 51.3  |                 |
| White                                    | 239                       | 3.9%  | 675                     | 8.1%  |                 |
| Employed                                 |                           |       |                         |       | 0.222           |
| Yes                                      | 1,788                     | 29.4% | 2,785                   | 33.7% |                 |
| Retired/Unable to work                   | 2,989                     | 49.1% | 3,920                   | 47.4% |                 |
| Other                                    | 1,314                     | 21.6% | 1,559                   | 18.9% |                 |
| <b>II. Health insurance</b>              |                           |       |                         |       |                 |
| Has health insurance                     | 5,864                     | 94.8% | 7,770                   | 93.6% | 0.410           |
| Type of health insurance                 |                           |       |                         |       | 0.681           |
| Employer                                 | 995                       | 17.5% | 1,542                   | 20.2% |                 |
| Medicaid                                 | 2,800                     | 49.1% | 3,694                   | 48.3% |                 |
| Medicare                                 | 1,444                     | 25.3% | 1,839                   | 24.1% |                 |
| Other                                    | 459                       | 8.0%  | 567                     | 7.4%  |                 |
| Any health insurance problems, P12M      | 1,160                     | 20.7% | 1,706                   | 22.7% | 0.401           |
| If yes, type of problem                  |                           |       |                         |       |                 |
| Getting health coverage                  | 456                       | 8.1%  | 613                     | 8.2%  | 0.969           |
| Problems with billing                    | 441                       | 7.9%  | 803                     | 10.7% | 0.097           |
| Finding affordable care                  | 387                       | 6.9%  | 512                     | 6.8%  | 0.973           |
| Navigating the systems                   | 388                       | 6.9%  | 510                     | 6.8%  | 0.947           |
| Appealing decisions                      | 240                       | 4.3%  | 317                     | 4.2%  | 0.978           |
| Another problem                          | 178                       | 3.2%  | 263                     | 3.5%  | 0.759           |
| <b>III. General health and behaviors</b> |                           |       |                         |       |                 |
| Self-reported general health             |                           |       |                         |       | 0.330           |

**Appendix**  
**A Place-Based Community Health Worker Program: Feasibility and Early Outcomes, New York City, 2015**  
**Lopez et al.**

|                                                                           |       |       |       |       |       |
|---------------------------------------------------------------------------|-------|-------|-------|-------|-------|
| Good to excellent                                                         | 3,350 | 54.0% | 4,236 | 51.2% |       |
| Fair/Poor                                                                 | 2,860 | 46.0% | 4,039 | 48.8% |       |
| Self-reported mental health                                               |       |       |       |       | 0.534 |
| Good to excellent                                                         | 4,507 | 72.6% | 5,894 | 71.0% |       |
| Fair/Poor                                                                 | 1,701 | 27.4% | 2,402 | 29.0% |       |
| Any physical activities, P30D                                             | 3,410 | 55.0% | 4,783 | 57.6% | 0.349 |
| Health problem limits activities, past 6 months (Very limited or limited) | 2,434 | 39.8% | 3,364 | 40.6% | 0.767 |
| Currently smoking                                                         | 1,294 | 20.8% | 1,723 | 20.7% | 0.971 |
| <b>IV. Specific health condition</b>                                      |       |       |       |       |       |
| Ever told have asthma                                                     |       |       |       |       | 0.507 |
| Current asthma attack, P12M                                               | 755   | 12.1% | 972   | 11.7% |       |
| Asthma, no attack, P12M                                                   | 955   | 15.4% | 1,479 | 17.8% |       |
| Ever told have diabetes                                                   | 1,763 | 28.5% | 2,162 | 26.0% | 0.465 |
| Ever told have hypertension                                               | 3,378 | 54.6% | 4,412 | 53.1% | 0.612 |
| Ever told have depression                                                 | 1,601 | 25.9% | 2,139 | 25.9% | 0.996 |
| Have diagnosed condition/Interested in CHW program referral               |       |       |       |       |       |
| Hypertension                                                              | 1,575 | 48.6% | ---   |       |       |
| Diabetes                                                                  | 823   | 48.9% | ---   |       |       |
| Asthma                                                                    | 435   | 48.9% | ---   |       |       |
| <b>V. Social connectedness</b>                                            |       |       |       |       |       |
| Among 60+ years, any senior center use, P3M                               | 654   | 24.4% | 770   | 22.4% | 0.578 |
| Among all, any community center use, P3M                                  | 1,380 | 22.3% | 1,820 | 22.4% | 0.981 |
| Often feel lonely or lack of companionship                                | 1,027 | 16.9% | 1,499 | 18.2  | 0.650 |

---

P12M, past 12 months; P30D, past 30 days; CHW, community health worker; P3M, past 3 months

**Appendix Table 2.** Key Themes From Open-Ended Questions, 3 Month Follow-Up: East Harlem, 2015

| <b>Key themes</b>                                                                                                                                                                       | <b>Illustrative quotes</b>                                                                                                                                                                                                                                                                                                                                                                                                                                                                                                                                                                                                                                                                                                                                                                                                                                                                                                                                                             |
|-----------------------------------------------------------------------------------------------------------------------------------------------------------------------------------------|----------------------------------------------------------------------------------------------------------------------------------------------------------------------------------------------------------------------------------------------------------------------------------------------------------------------------------------------------------------------------------------------------------------------------------------------------------------------------------------------------------------------------------------------------------------------------------------------------------------------------------------------------------------------------------------------------------------------------------------------------------------------------------------------------------------------------------------------------------------------------------------------------------------------------------------------------------------------------------------|
| Health Advocates (HAs) provided assistance to HHAP participants in resolving health insurance issues and linking participants with medical equipment, medications, and related services | <p><i>I had Medicaid and Medicare and [the HAs] helped me combine both so that I wouldn't have to pay copayments.</i></p> <p><i>Helped me find an insurance that directly addressed my health and solve my financial problems.</i></p> <p><i>She resolved a problem that I was having by helping me reduce the costs that I was being charged for my prescriptions.</i></p> <p><i>[HAs] are helping me with figuring the copays</i></p> <p><i>I was accepted very fast [by health insurance] and did not have to travel out of my way to obtain the services I needed</i></p> <p><i>The fact that they could fix and get my mom her wheelchair in one week when I could not get it done in a whole year.</i></p> <p><i>Helping me with blood pressure machine.</i></p> <p><i>They checked in on his health and helped me with problems with housing. They resolved my issues with housing.</i></p> <p><i>Because [the HA] is making things that I didn't know available to me.</i></p> |
| Community health workers (CHWs) provide instrumental support to HHAP participants by linking them to needed services and helping participants engage in health promotion behavior       | <p><i>Inform you of things that I didn't know about. They take my BP and weight when they visit and check in on me.</i></p> <p><i>She showed me how to manage my knee pain, plan for my food and how to cook it, help with disability, keeping my pressure controlled, very happy with services.</i></p> <p><i>Made me start walking, if I could give him a 20 I would give him that. I didn't like him at first but I grew to appreciate him, he pushes me and he texts me to remember about my health needs.</i></p> <p><i>Goes with me to the appointments, eat healthy, walking, pushes me to do things.</i></p> <p><i>She makes goals for me, she helps me with my medications and what I need to keep better, she is lovely.</i></p>                                                                                                                                                                                                                                             |

|                                                                                                                                                              |                                                                                                                                                                                                                                                                                                                                                                                                                                                                                                                                                                                                                                                                                                                                                                                                                                                                                                                                                                                                                                                                                                                        |
|--------------------------------------------------------------------------------------------------------------------------------------------------------------|------------------------------------------------------------------------------------------------------------------------------------------------------------------------------------------------------------------------------------------------------------------------------------------------------------------------------------------------------------------------------------------------------------------------------------------------------------------------------------------------------------------------------------------------------------------------------------------------------------------------------------------------------------------------------------------------------------------------------------------------------------------------------------------------------------------------------------------------------------------------------------------------------------------------------------------------------------------------------------------------------------------------------------------------------------------------------------------------------------------------|
|                                                                                                                                                              | <p><i>He explaining to me about hypertension, effects of sodium, bad cholesterol, goes over foods and ingredients that are unhealthy. Very thorough with a lot go things, free yoga classes, pantry if wanted to go to, very resourceful and patient.</i></p> <p><i>Discouraged to see the doctor and appointments were being canceled and hard to reschedule appointments took months. She convinced me that I needed to go to the doctor, very good at convincing me that I need to take care of me.</i></p> <p><i>When I showed him the problems that I am having at home in NYCHA the housing finally started to make changes in my home.</i></p>                                                                                                                                                                                                                                                                                                                                                                                                                                                                  |
| CHWs provide and facilitate social support to HHAP participants, mitigating loneliness and social isolation, and providing a source of comfort for residents | <p><i>Plays checkers with me.</i></p> <p><i>They really talk to you.</i></p> <p><i>Because she listens to me and tries to help me resolve whatever issue I may have. She is there for me when I need help and is accessible over the phone.</i></p> <p><i>A) Gets me away from drama b) voice my situation, what's going on with me c) good to have a neutral person who isn't gossipy and would spread secrets.</i></p> <p><i>Because they brought more activities to the community center, walking to the central park, needed to gain my trust but she finally got it. As we get older we need someone to talk to, and it is very helpful.</i></p> <p><i>He's a person that you can tell he really cares. He listens, responds, and does things to help me improve in a manner that is easy for me to understand.</i></p> <p><i>She is concerned about my health, she is like my momma, she gets on me about health, and she feels like her care about me, she is good people.</i></p> <p><i>You get to know that you are not the only one that has that problem. And you can end up helping somebody else.</i></p> |
| HHAP, Harlem Health Advocacy Partnership; CHW, community health worker; NYCHA, New York City Housing Authority                                               |                                                                                                                                                                                                                                                                                                                                                                                                                                                                                                                                                                                                                                                                                                                                                                                                                                                                                                                                                                                                                                                                                                                        |
